# Supplementary material for: Porous silicon as an agent for cancer thermotherapy based on near-infrared light irradiation
Source: Royal Society of Chemistry journal article supplement (doi:10.1039/b808500e), 2008-01-01
Supplement: b808500e.pdf [file b808500e.pdf]

## Electronic Supplementary Information

### Appendix 1. Heat generation of PSi/NaCl suspension upon exposure to NIR light

Figure S1 shows that there is almost no difference in the absorption property between NaCl solution and deionized (D.I.) water, suggesting that NaCl does not affect the optical properties of the PSi suspension. Figure S2 shows that the temperature of NaCl solution is the same as that of D.I. water after 20 min NIR irradiation although the former is slightly higher than the latter for the NIR exposure times less than 17 min. This result suggests that NaCl makes little effect on the photothermal effect of water.

Figure S3 is wide scan XPS spectra of the PSi/NaCl suspension after 20 min NIR irradiation. The details of the main peaks in the XPS spectra are given in Table S1 along with relevant compounds. Table S2 indicates that Na<sup>+</sup> ions form Na compounds such as Na<sub>2</sub>SiF<sub>6</sub> by reacting with Si, O and F atoms upon exposure to NIR light. F atoms existing in the PSi suspension seem to originate from the HF/C<sub>2</sub>H<sub>5</sub>OH solution used for electrochemical anodization of Si to synthesize the PSi. There can be many spontaneous chemical reactions for Na<sub>2</sub>SiF<sub>6</sub> formation. As an example, we may hypothesize a chemical reaction for Na<sub>2</sub>SiF<sub>6</sub> formation as follows:

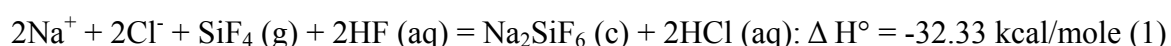

where SiF<sub>4</sub> and HF may originate from the HF/C<sub>2</sub>H<sub>5</sub>OH anodization solution. SiF<sub>4</sub> represents a chemical reaction product of Si and HF. However, F may exist not as a component of a compound such as SiF<sub>4</sub> but as just impurity atoms adsorbed by PSi or an anodization residue in a state of HF at the surface of PSi in reality. The enthalpy change ( $\Delta H^\circ$ ) for the reaction to form 1 mole of Na<sub>2</sub>SiF<sub>6</sub> (c) calculated using the thermodynamic data shown in Table S2 is -32.33 kcal/mole. The negative value of  $\Delta H^\circ$  indicates that this reaction is exothermic. From the above discussion we may conclude that the heat generation effect of NaCl in the PSi/NaCl-suspension is not due to the photothermal effect of NaCl itself but due to the chemical reaction of Na<sup>+</sup> ions with Si atoms at the surface of PSi and F atoms existing as impurities in the suspension.

Table S1. Details of the main peaks in the XPS spectra of the PSi/NaCl suspension after 20 min NIR irradiation along with relevant compounds

| PSi/NaCl-suspension           |                          | Candidates                       |                                  |
|-------------------------------|--------------------------|----------------------------------|----------------------------------|
| Elemental Identification Name | Peak Binding Energy (eV) | Compound Name                    | Binding Energy <sup>1</sup> (eV) |
| Si 2P                         | 103.21                   | SiO <sub>2</sub>                 | 103.6                            |
|                               |                          | Na <sub>2</sub> SiF <sub>6</sub> | 104.3                            |
| F 1S                          | 685.99                   | Na <sub>2</sub> SiF <sub>6</sub> | 686.0                            |
| Na 1S                         | 1072.86                  | Na <sub>2</sub> SiF <sub>6</sub> | 1071.7                           |
| O 1S                          | 533.07                   | SiO <sub>2</sub>                 | 533                              |
| Cl 2P                         | 200.19                   | NaCl                             | 198.4                            |
| C 1S                          | 286.20                   | C <sub>2</sub> H <sub>5</sub> OH | 286.3                            |

Table S2. Heat of formation of the substances involved in the chemical reaction for Na<sub>2</sub>SiF<sub>6</sub> formation

| Substance                                                         | Na <sup>+</sup> | Cl <sup>-</sup> | SiF <sub>4</sub> (g) | HF (aq) | Na <sub>2</sub> SiF <sub>6</sub> (c) | HCl (aq) |
|-------------------------------------------------------------------|-----------------|-----------------|----------------------|---------|--------------------------------------|----------|
| Heat of formation <sup>2</sup> ( $\Delta H_f^\circ$ ) (kcal/mole) | -57.28          | -40.02          | -370                 | -78.66  | -677                                 | -40.02   |

Figure S4 shows a similar result obtained by Moench et al.<sup>3</sup> using ferromagnetic Fe-filled multiwall carbon nanotube (Fe-CNT) and Fe-CNT/NaCl-suspension. The temperature curves were obtained by measuring the temperature of the muscle tissue during alternating current (AC)-heating. This result suggests that NaCl also affects the photothermal property of CNT. The enhancement in the heat generation property of CNT by NaCl solution may be due to the chemical reaction of Na<sup>+</sup> with carbon and other impurity atoms such as oxygen, since NaCl solution itself has no photothermal effect.

## Appendix 2. In vivo cell test results

Table S3. MTT Assay Test Results

| Sample | Treatment                 | NIR exposure time (min) | Cell viability (%) * |        |        |         |
|--------|---------------------------|-------------------------|----------------------|--------|--------|---------|
|        |                           |                         | Test 1               | Test 2 | Test 3 | Average |
| A      | Control                   | 20                      | 94.7                 | 108.3  | 96.4   | 99.8    |
| B1     | PSi/NaCl suspension       | 10                      | 103.3                | 95.8   | 97.8   | 98.9    |
| C1     | Control + NIR             | 10                      | 93.0                 | 100.5  | 97.1   | 96.9    |
| D1     | PSi/NaCl suspension + NIR | 10                      | 4.7                  | 3.7    | 5.4    | 4.6     |
| B2     | PSi/NaCl suspension       | 20                      | 90.6                 | 97.1   | 106.5  | 98.1    |
| C2     | Control + NIR             | 20                      | 99.2                 | 95.7   | 90.6   | 95.2    |
| D2     | PSi/NaCl suspension + NIR | 20                      | 3.2                  | 2.1    | 2.5    | 2.6     |

\* MTT assay is a laboratory test and a standard colorimetric assay (an assay which measures changes in color) for measuring the activity of enzymes that reduce MTT to formazan, giving a purple color. Yellow MTT is reduced to a purple formazan in the mitochondria of living cells. A solubilization solution is added to dissolve the insoluble purple formazan product into a colored solution. The absorbance of this colored solution can be quantified by measuring at a certain wavelength by a spectrophotometer. Some suspension may remain even after media is removed and may affect the color of the formazan, resulting in the cell viability. Although cell viability cannot exceed 100 % theoretically, cell viability values higher than 100 % are commonly obtained experimentally. The cell viability data in Table S3 is just the raw data obtained experimentally. The cell viability values higher than 100 % may be regarded as 100 %.

## References

- 1 J. F. Moulder, W. F. Stickle, P. E. Sobol and K. Bomben, *Handbook of X-Ray Photoelectron Spectroscopy*, Physical Electronics, Inc., Minnesota, USA, 1995.
- 2 *CRC Handbook of Chemistry and Physics*, ed. R. C. Weast, 58th edn, CRC Press, Inc., Florida, USA, 1978.
- 3 I. Moench, A. Meye, and A. Leonhardt, Chapter 9 in *Nanomaterials for Cancer Therapy*,

ed. C. Kumar, Wiley-VCH Verlag GmbH & Co. KGaA, Weinheim, 2006.

## Figure Captions

Figure S1. The absorption spectra of D. I. water, 0.9 % NaCl solution, and 17 % NaCl solution after 300 mW/cm<sup>2</sup> NIR irradiation for 20 min.

Figure S2. Comparison of the heat generation abilities of 0.9 % NaCl solution and D. I. water.

Figure S3. XPS spectra of the PSi / NaCl suspension after 20 min NIR irradiation.

Figure S4. Temperature development in the muscle tissue into which Fe-CNTs or Fe-CNT / NaCl-suspension was injected.<sup>3</sup>

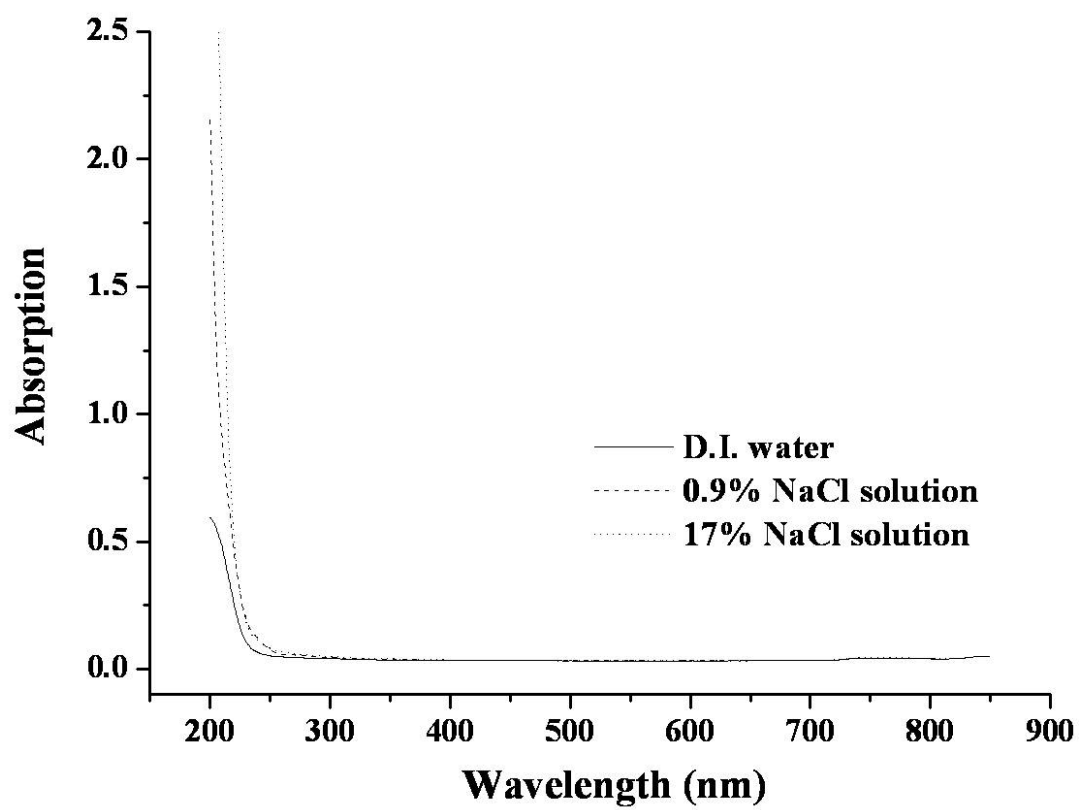

**Fig. S1**

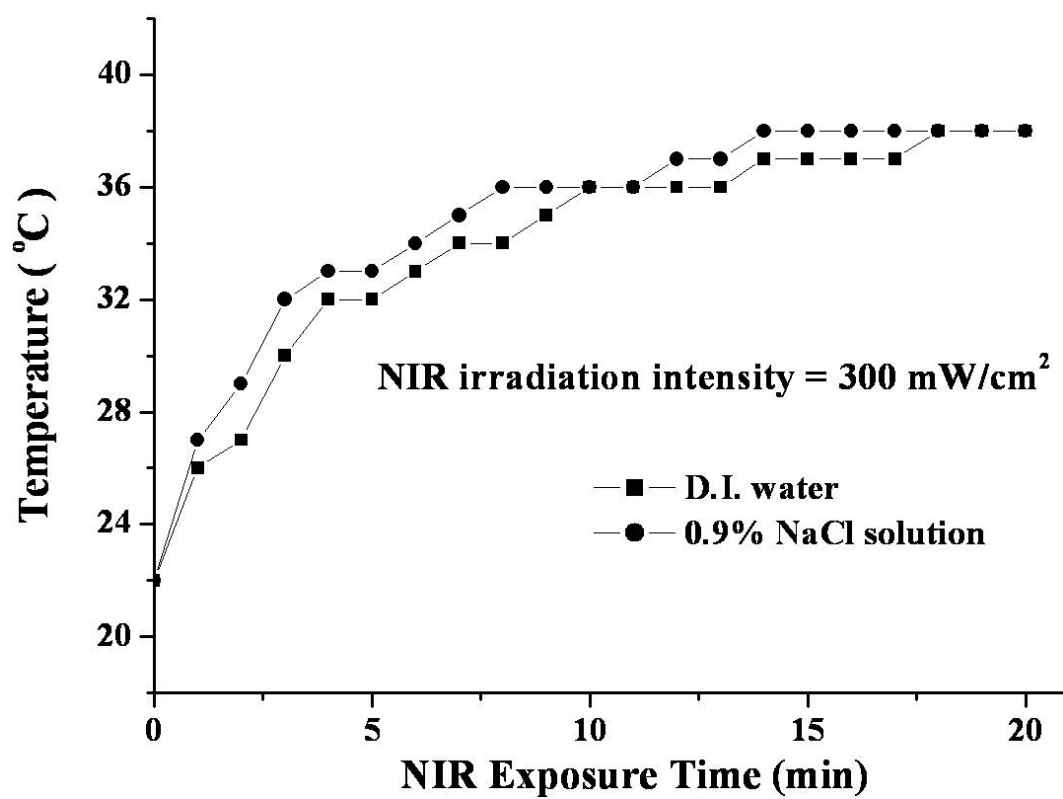

**Fig. S2**

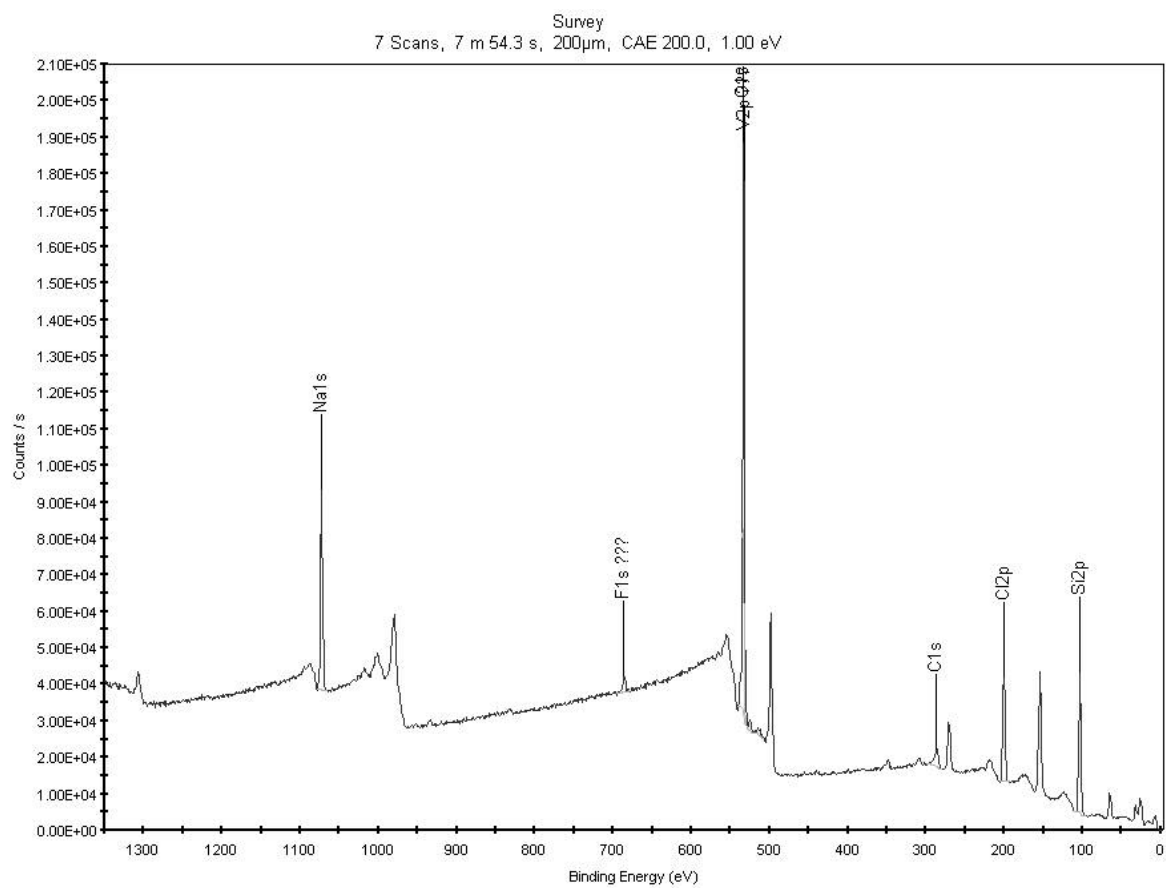

**Fig. S3**

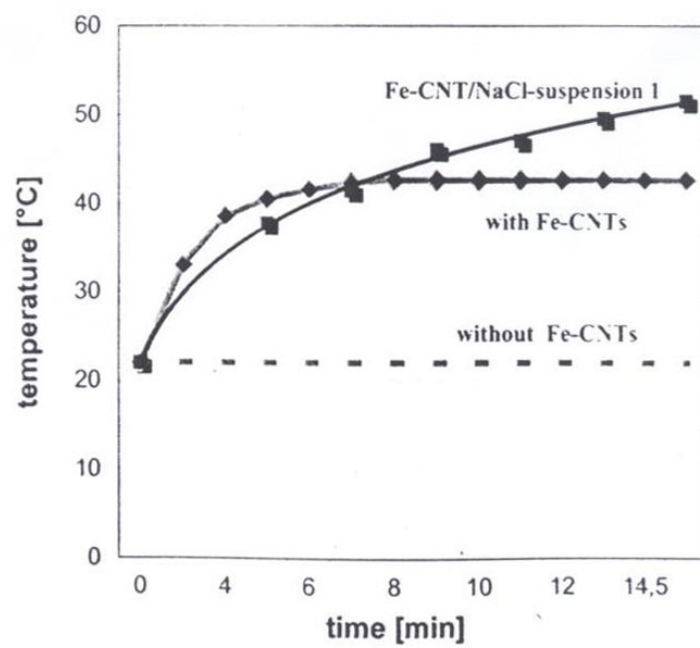

**Fig. S4**
